# Supplementary material for: A successful method to restore seagrass habitats in coastal areas affected by consecutive natural events
Source: PeerJ journal article supplement (doi:10.7717/peerj.16700), 2024-01-02

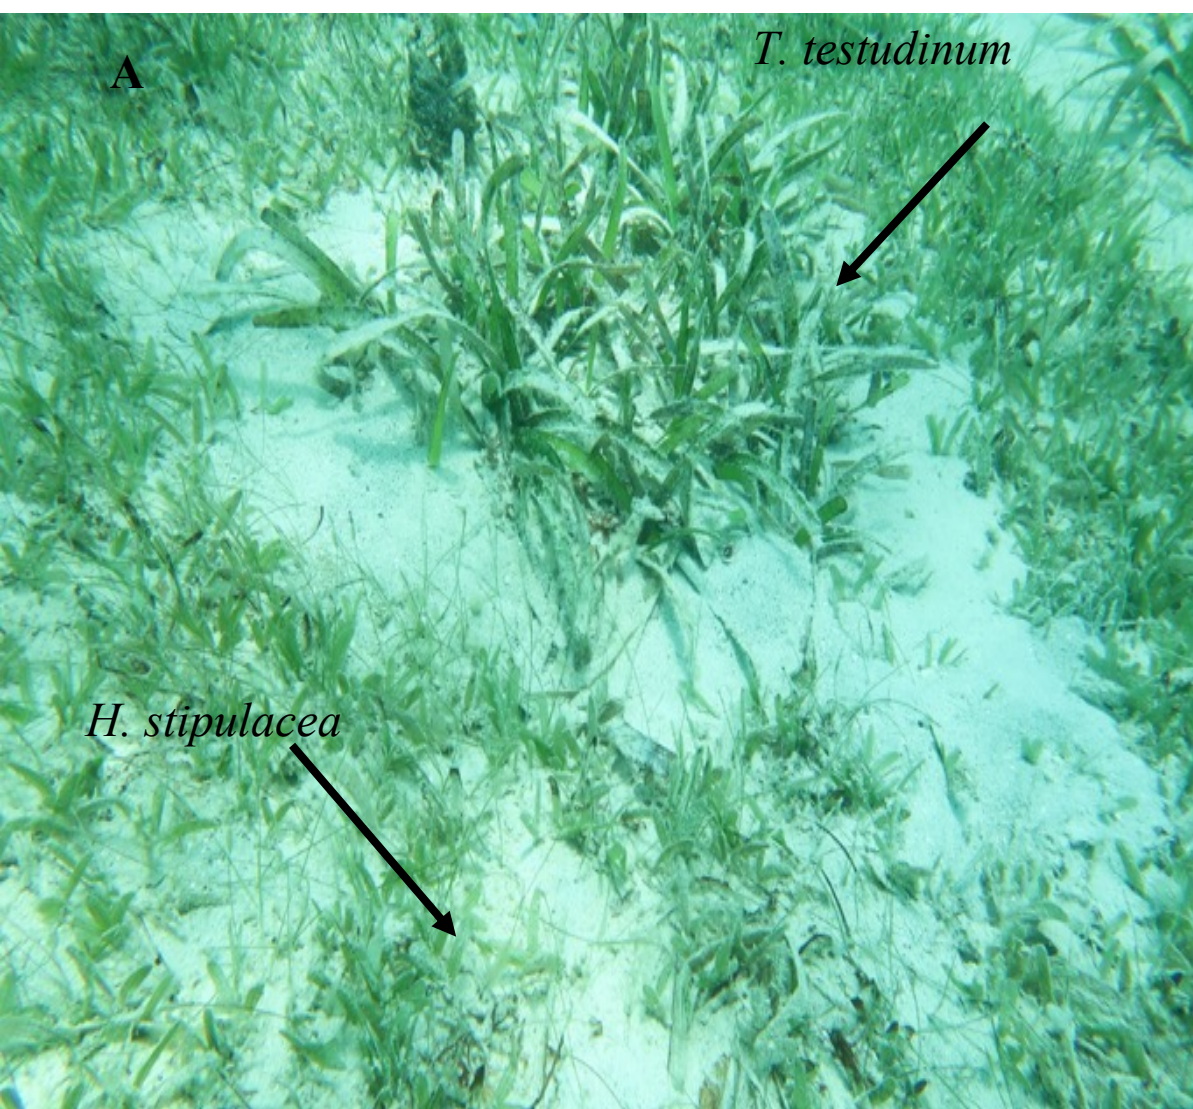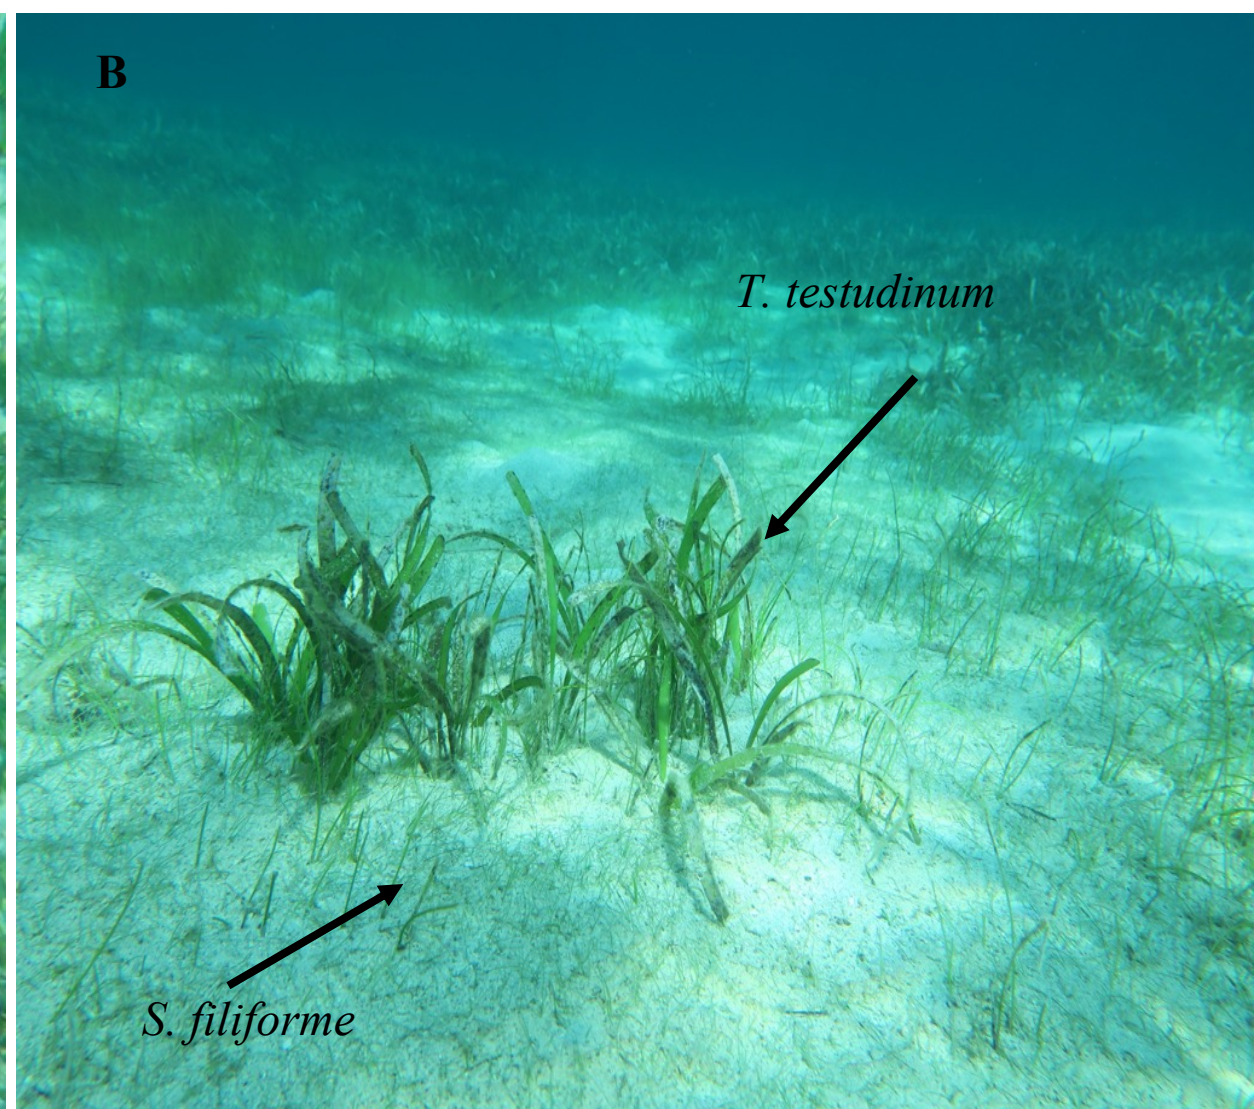

Supplement: Figure_3S.pdf [file Figure_3S.pdf]
