# Supplementary material for: A successful method to restore seagrass habitats in coastal areas affected by consecutive natural events
Source: PeerJ. 2024 Jan 2;12:e16700. doi: 10.7717/peerj.16700 (PMC10768669; doi:10.7717/peerj.16700)
Supplement: Supplemental Information 1 — Variables were measured in each of the marked PUs over time to monitor the success of the restoration project. Statistical analysis was conducted on this data to compare planting or blocks over time regarding PUs area, cover, and shoot density. [file peerj-12-16700-s001.xlsx]

## Sheet: Area
NumberTag	Site	ColorTag	Block	Date	Days	Monitoring	AreaPU	S-Tt	S-Sf	TotalDensity
1	PTM	NaranjaGrande	B-1	2021-08-01	Cero	T0	750	80	4	84
2	PTM	NaranjaGrande	B-1	2021-08-01	Cero	T0	750	42	7	49
3	PTM	NaranjaGrande	B-1	2021-08-01	Cero	T0	1344	59	0	59
4	PTM	NaranjaGrande	B-1	2021-08-01	Cero	T0	1599	62	3	65
5	PTM	NaranjaGrande	B-1	2021-08-01	Cero	T0	1369	52	4	56
6	PTM	NaranjaGrande	B-1	2021-08-01	Cero	T0	1794	59	11	70
7	PTM	NaranjaGrande	B-1	2021-08-01	Cero	T0	1521	40	12	52
8	PTM	NaranjaGrande	B-1	2021-08-01	Cero	T0	1521	41	25	66
9	PTM	NaranjaGrande	B-1	2021-08-01	Cero	T0	1521	82	5	87
10	PTM	NaranjaGrande	B-1	2021-08-01	Cero	T0	1755	53	31	84
11	PTM	NaranjaGrande	B-1	2021-08-01	Cero	T0	806	47	2	49
12	PTM	NaranjaGrande	B-1	2021-08-01	Cero	T0	800	34	2	36
13	PTM	NaranjaGrande	B-1	2021-08-01	Cero	T0	1134	19	6	25
14	PTM	NaranjaGrande	B-1	2021-08-01	Cero	T0	1134	51	3	54
15	PTM	NaranjaGrande	B-1	2021-08-01	Cero	T0	1134	64	7	71
16	PTM	NaranjaGrande	B-1	2021-08-01	Cero	T0	800	69	12	81
17	PTM	NaranjaGrande	B-1	2021-08-01	Cero	T0	1404	77	4	81
18	PTM	NaranjaGrande	B-1	2021-08-01	Cero	T0	1152	34	2	36
19	PTM	NaranjaGrande	B-1	2021-08-01	Cero	T0	1400	52	3	55
21	PTM	NaranjaGrande	B-1	2021-08-01	Cero	T0	960	80	0	80
22	PTM	NaranjaGrande	B-1	2021-08-01	Cero	T0	980	46	22	68
23	PTM	NaranjaGrande	B-1	2021-08-01	Cero	T0	754	42	4	46
24	PTM	NaranjaGrande	B-1	2021-08-01	Cero	T0	1292	52	6	58
25	PTM	NaranjaGrande	B-1	2021-08-01	Cero	T0	1332	51	6	57
26	PTM	NaranjaGrande	B-1	2021-08-01	Cero	T0	1280	42	0	42
27	PTM	NaranjaGrande	B-1	2021-08-01	Cero	T0	1505	76	2	78
28	PTM	NaranjaGrande	B-1	2021-08-01	Cero	T0	493	15	0	15
29	PTM	NaranjaGrande	B-1	2021-08-01	Cero	T0	1088	45	3	48
30	PTM	NaranjaGrande	B-1	2021-08-01	Cero	T0	1287	60	0	60
1	PTM	AzulPequeno	B-2	2022-02-19	Cero	T0	884	58	4	62
2	PTM	AzulPequeno	B-2	2022-02-19	Cero	T0	960	58	0	58
3	PTM	AzulPequeno	B-2	2022-02-19	Cero	T0	864	35	0	35
4	PTM	AzulPequeno	B-2	2022-02-19	Cero	T0	1190	63	0	63
5	PTM	AzulPequeno	B-2	2022-02-19	Cero	T0	640	48	0	48
6	PTM	AzulPequeno	B-2	2022-02-19	Cero	T0	952	57	0	57
7	PTM	AzulPequeno	B-2	2022-02-19	Cero	T0	972	45	0	45
8	PTM	AzulPequeno	B-2	2022-02-19	Cero	T0	960	69	0	69
9	PTM	AzulPequeno	B-2	2022-02-19	Cero	T0	1520	55	12	67
10	PTM	AzulPequeno	B-2	2022-02-19	Cero	T0	1190	67	0	67
11	PTM	AzulPequeno	B-2	2022-02-19	Cero	T0	1296	70	1	71
12	PTM	AzulPequeno	B-2	2022-02-19	Cero	T0	1280	68	1	69
13	PTM	AzulPequeno	B-2	2022-02-19	Cero	T0	990	100	0	100
14	PTM	AzulPequeno	B-2	2022-02-19	Cero	T0	1280	79	0	79
15	PTM	AzulPequeno	B-2	2022-02-19	Cero	T0	988	87	0	87
16	PTM	AzulPequeno	B-2	2022-02-19	Cero	T0	1575	124	0	124
17	PTM	AzulPequeno	B-2	2022-02-19	Cero	T0	1400	98	2	100
18	PTM	AzulPequeno	B-2	2022-02-19	Cero	T0	1428	67	54	121
19	PTM	AzulPequeno	B-2	2022-02-19	Cero	T0	1692	69	44	113
20	PTM	AzulPequeno	B-2	2022-02-19	Cero	T0	1258	55	13	68
21	PTM	AzulPequeno	B-2	2022-02-19	Cero	T0	1178	62	35	97
22	PTM	AzulPequeno	B-2	2022-02-19	Cero	T0	1600	132	20	152
23	PTM	AzulPequeno	B-2	2022-02-19	Cero	T0	1978	67	85	152
24	PTM	AzulPequeno	B-2	2022-02-19	Cero	T0	1892	89	37	126
25	PTM	AzulPequeno	B-2	2022-02-19	Cero	T0	1890	70	16	86
26	PTM	AzulPequeno	B-2	2022-02-19	Cero	T0	1935	65	58	123
27	PTM	AzulPequeno	B-2	2022-02-19	Cero	T0	1520	56	28	84
28	PTM	AzulPequeno	B-2	2022-02-19	Cero	T0	1482	82	25	107
29	PTM	AzulPequeno	B-2	2022-02-19	Cero	T0	1806	66	10	76
30	PTM	AzulPequeno	B-2	2022-02-19	Cero	T0	494	25	2	27
4	PTM	VerdePequeno	B-3	2022-04-03	Cero	T0	754	31	0	31
5	PTM	VerdePequeno	B-3	2022-04-03	Cero	T0	440	20	0	20
7	PTM	VerdePequeno	B-3	2022-04-03	Cero	T0	1020	38	0	38
8	PTM	VerdePequeno	B-3	2022-04-03	Cero	T0	1156	65	10	75
9	PTM	VerdePequeno	B-3	2022-04-03	Cero	T0	918	40	0	40
10	PTM	VerdePequeno	B-3	2022-04-03	Cero	T0	616	45	0	45
13	PTM	VerdePequeno	B-3	2022-04-03	Cero	T0	1036	65	0	65
14	PTM	VerdePequeno	B-3	2022-04-03	Cero	T0	990	52	0	52
15	PTM	VerdePequeno	B-3	2022-04-03	Cero	T0	1155	60	0	60
18	PTM	VerdePequeno	B-3	2022-04-03	Cero	T0	775	42	0	42
845	PTM	ChapaMetalica	B-4	2022-05-17	Cero	T0	1147	82	44	126
846	PTM	ChapaMetalica	B-4	2022-05-17	Cero	T0	1406	102	21	123
850	PTM	ChapaMetalica	B-4	2022-05-17	Cero	T0	1600	99	30	129
851	PTM	ChapaMetalica	B-4	2022-05-17	Cero	T0	1190	85	18	103
852	PTM	ChapaMetalica	B-4	2022-05-17	Cero	T0	1302	81	29	110
853	PTM	ChapaMetalica	B-4	2022-05-17	Cero	T0	1452	60	17	77
854	PTM	ChapaMetalica	B-4	2022-05-17	Cero	T0	1680	87	16	103
1	PTM	NaranjaGrande	B-1	2022-02-19	Cero	T1	1800	86	7	93
2	PTM	NaranjaGrande	B-1	2022-02-19	DoscientosTres	T1	1248	58	15	73
3	PTM	NaranjaGrande	B-1	2022-02-19	DoscientosTres	T1	1720	82	56	138
4	PTM	NaranjaGrande	B-1	2022-02-19	DoscientosTres	T1	1804	67	21	88
5	PTM	NaranjaGrande	B-1	2022-02-19	DoscientosTres	T1	1722	104	11	115
6	PTM	NaranjaGrande	B-1	2022-02-19	DoscientosTres	T1	1620	89	12	101
7	PTM	NaranjaGrande	B-1	2022-02-19	DoscientosTres	T1	1512	60	18	78
8	PTM	NaranjaGrande	B-1	2022-02-19	DoscientosTres	T1	1596	40	0	40
9	PTM	NaranjaGrande	B-1	2022-02-19	DoscientosTres	T1	1920	100	10	110
10	PTM	NaranjaGrande	B-1	2022-02-19	DoscientosTres	T1	1680	89	58	147
11	PTM	NaranjaGrande	B-1	2022-02-19	DoscientosTres	T1	1216	49	13	62
12	PTM	NaranjaGrande	B-1	2022-02-19	DoscientosTres	T1	675	55	4	59
13	PTM	NaranjaGrande	B-1	2022-02-19	DoscientosTres	T1	405	16	15	31
14	PTM	NaranjaGrande	B-1	2022-02-19	DoscientosTres	T1	1650	66	12	78
15	PTM	NaranjaGrande	B-1	2022-02-19	DoscientosTres	T1	1350	56	26	82
16	PTM	NaranjaGrande	B-1	2022-02-19	DoscientosTres	T1	1240	63	14	77
17	PTM	NaranjaGrande	B-1	2022-02-19	DoscientosTres	T1	1260	82	15	97
18	PTM	NaranjaGrande	B-1	2022-02-19	DoscientosTres	T1	1440	46	25	71
19	PTM	NaranjaGrande	B-1	2022-02-19	DoscientosTres	T1	1400	53	3	56
22	PTM	NaranjaGrande	B-1	2022-02-19	DoscientosTres	T1	2000	51	15	66
23	PTM	NaranjaGrande	B-1	2022-02-19	DoscientosTres	T1	1480	43	13	56
24	PTM	NaranjaGrande	B-1	2022-02-19	DoscientosTres	T1	1480	60	11	71
25	PTM	NaranjaGrande	B-1	2022-02-19	DoscientosTres	T1	1800	55	5	60
26	PTM	NaranjaGrande	B-1	2022-02-19	DoscientosTres	T1	1406	54	0	54
27	PTM	NaranjaGrande	B-1	2022-02-19	DoscientosTres	T1	1800	55	10	65
28	PTM	NaranjaGrande	B-1	2022-02-19	DoscientosTres	T1	600	11	0	11
29	PTM	NaranjaGrande	B-1	2022-02-19	DoscientosTres	T1	2385	65	6	71
1	PTM	AzulPequeno	B-2	2022-07-14	CientoCuarentaSeis	T1	1224	63	2	65
2	PTM	AzulPequeno	B-2	2022-07-14	CientoCuarentaSeis	T1	1224	49	5	54
3	PTM	AzulPequeno	B-2	2022-07-14	CientoCuarentaSeis	T1	1600	83	0	83
4	PTM	AzulPequeno	B-2	2022-07-14	CientoCuarentaSeis	T1	918	69	0	69
5	PTM	AzulPequeno	B-2	2022-07-14	CientoCuarentaSeis	T1	1120	61	0	61
6	PTM	AzulPequeno	B-2	2022-07-14	CientoCuarentaSeis	T1	1739	79	0	79
7	PTM	AzulPequeno	B-2	2022-07-14	CientoCuarentaSeis	T1	1287	76	0	76
8	PTM	AzulPequeno	B-2	2022-07-14	CientoCuarentaSeis	T1	1656	66	12	78
9	PTM	AzulPequeno	B-2	2022-07-14	CientoCuarentaSeis	T1	1763	106	0	106
10	PTM	AzulPequeno	B-2	2022-07-14	CientoCuarentaSeis	T1	1848	88	2	90
11	PTM	AzulPequeno	B-2	2022-07-14	CientoCuarentaSeis	T1	1845	83	3	86
12	PTM	AzulPequeno	B-2	2022-07-14	CientoCuarentaSeis	T1	1716	96	0	96
13	PTM	AzulPequeno	B-2	2022-07-14	CientoCuarentaSeis	T1	1599	84	0	84
14	PTM	AzulPequeno	B-2	2022-07-14	CientoCuarentaSeis	T1	1440	70	0	70
15	PTM	AzulPequeno	B-2	2022-07-14	CientoCuarentaSeis	T1	2050	105	26	131
16	PTM	AzulPequeno	B-2	2022-07-14	CientoCuarentaSeis	T1	1978	98	0	98
17	PTM	AzulPequeno	B-2	2022-07-14	CientoCuarentaSeis	T1	2397	87	79	166
18	PTM	AzulPequeno	B-2	2022-07-14	CientoCuarentaSeis	T1	2860	76	96	172
19	PTM	AzulPequeno	B-2	2022-07-14	CientoCuarentaSeis	T1	1980	73	58	131
20	PTM	AzulPequeno	B-2	2022-07-14	CientoCuarentaSeis	T1	2400	74	79	153
21	PTM	AzulPequeno	B-2	2022-07-14	CientoCuarentaSeis	T1	2880	114	52	166
22	PTM	AzulPequeno	B-2	2022-07-14	CientoCuarentaSeis	T1	3132	61	125	186
23	PTM	AzulPequeno	B-2	2022-07-14	CientoCuarentaSeis	T1	1680	94	27	121
24	PTM	AzulPequeno	B-2	2022-07-14	CientoCuarentaSeis	T1	3038	72	27	99
25	PTM	AzulPequeno	B-2	2022-07-14	CientoCuarentaSeis	T1	3082	80	86	166
26	PTM	AzulPequeno	B-2	2022-07-14	CientoCuarentaSeis	T1	2016	59	33	92
27	PTM	AzulPequeno	B-2	2022-07-14	CientoCuarentaSeis	T1	3960	82	35	117
28	PTM	AzulPequeno	B-2	2022-07-14	CientoCuarentaSeis	T1	3200	65	22	87
29	PTM	AzulPequeno	B-2	2022-07-14	CientoCuarentaSeis	T1	1666	44	21	65
4	PTM	VerdePequeno	B-3	2022-07-14	CientoTres	T1	754	37	2	39
5	PTM	VerdePequeno	B-3	2022-07-14	CientoTres	T1	525	40	15	55
7	PTM	VerdePequeno	B-3	2022-07-14	CientoTres	T1	1020	51	0	51
8	PTM	VerdePequeno	B-3	2022-07-14	CientoTres	T1	1470	68	10	78
9	PTM	VerdePequeno	B-3	2022-07-14	CientoTres	T1	1161	59	0	59
10	PTM	VerdePequeno	B-3	2022-07-14	CientoTres	T1	840	49	0	49
13	PTM	VerdePequeno	B-3	2022-07-14	CientoTres	T1	1260	47	0	47
14	PTM	VerdePequeno	B-3	2022-07-14	CientoTres	T1	1080	36	0	36
15	PTM	VerdePequeno	B-3	2022-07-14	CientoTres	T1	1848	81	2	83
18	PTM	VerdePequeno	B-3	2022-07-14	CientoTres	T1	800	44	4	48
845	PTM	ChapaMetalica	B-4	2022-07-14	CincuentaNueve	T1	3082	95	55	150
846	PTM	ChapaMetalica	B-4	2022-07-14	CincuentaNueve	T1	2350	87	3	90
850	PTM	ChapaMetalica	B-4	2022-07-14	CincuentaNueve	T1	2250	71	16	87
851	PTM	ChapaMetalica	B-4	2022-07-14	CincuentaNueve	T1	2394	66	11	77
852	PTM	ChapaMetalica	B-4	2022-07-14	CincuentaNueve	T1	2475	96	11	107
853	PTM	ChapaMetalica	B-4	2022-07-14	CincuentaNueve	T1	2880	93	22	115
854	PTM	ChapaMetalica	B-4	2022-07-14	CincuentaNueve	T1	2240	85	30	115
1	PTM	NaranjaGrande	B-1	2022-05-30	DoscientosTres	T2	1599	65	5	70
2	PTM	NaranjaGrande	B-1	2022-05-30	CientoUno	T2	1140	39	22	61
3	PTM	NaranjaGrande	B-1	2022-05-30	CientoUno	T2	2350	101	14	115
4	PTM	NaranjaGrande	B-1	2022-05-30	CientoUno	T2	1845	74	22	96
5	PTM	NaranjaGrande	B-1	2022-05-30	CientoUno	T2	2132	59	20	79
6	PTM	NaranjaGrande	B-1	2022-05-30	CientoUno	T2	1804	68	20	88
7	PTM	NaranjaGrande	B-1	2022-05-30	CientoUno	T2	1836	52	38	90
8	PTM	NaranjaGrande	B-1	2022-05-30	CientoUno	T2	1470	50	6	56
9	PTM	NaranjaGrande	B-1	2022-05-30	CientoUno	T2	2250	105	29	134
10	PTM	NaranjaGrande	B-1	2022-05-30	CientoUno	T2	2736	84	34	118
11	PTM	NaranjaGrande	B-1	2022-05-30	CientoUno	T2	1457	45	52	97
12	PTM	NaranjaGrande	B-1	2022-05-30	CientoUno	T2	2303	34	11	45
13	PTM	NaranjaGrande	B-1	2022-05-30	CientoUno	T2	390	16	6	22
14	PTM	NaranjaGrande	B-1	2022-05-30	CientoUno	T2	2200	42	16	58
15	PTM	NaranjaGrande	B-1	2022-05-30	CientoUno	T2	1824	48	43	91
16	PTM	NaranjaGrande	B-1	2022-05-30	CientoUno	T2	1680	48	8	56
17	PTM	NaranjaGrande	B-1	2022-05-30	CientoUno	T2	2565	80	26	106
18	PTM	NaranjaGrande	B-1	2022-05-30	CientoUno	T2	1292	52	40	92
19	PTM	NaranjaGrande	B-1	2022-05-30	CientoUno	T2	1406	47	5	52
21	PTM	NaranjaGrande	B-1	2022-05-30	CientoUno	T2	1530	85	13	98
22	PTM	NaranjaGrande	B-1	2022-05-30	CientoUno	T2	3000	70	43	113
23	PTM	NaranjaGrande	B-1	2022-05-30	CientoUno	T2	1296	43	18	61
24	PTM	NaranjaGrande	B-1	2022-05-30	CientoUno	T2	2112	60	30	90
25	PTM	NaranjaGrande	B-1	2022-05-30	CientoUno	T2	1974	45	11	56
26	PTM	NaranjaGrande	B-1	2022-05-30	CientoUno	T2	1435.5	42	0	42
27	PTM	NaranjaGrande	B-1	2022-05-30	CientoUno	T2	2444	55	6	61
28	PTM	NaranjaGrande	B-1	2022-05-30	CientoUno	T2	448	17	0	17
29	PTM	NaranjaGrande	B-1	2022-05-30	CientoUno	T2	1800	59	15	74
30	PTM	NaranjaGrande	B-1	2022-05-30	CientoUno	T2	1680	39	26	65
3	PTM	AzulPequeno	B-2	2023-02-18	DoscientosVeinte	T2	2331	65	7	72
10	PTM	AzulPequeno	B-2	2023-02-18	DoscientosVeinte	T2	3216	132	0	132
15	PTM	AzulPequeno	B-2	2023-02-18	DoscientosVeinte	T2	2850	105	0	105
16	PTM	AzulPequeno	B-2	2023-02-18	DoscientosVeinte	T2	3600	113	6	119
17	PTM	AzulPequeno	B-2	2023-02-18	DoscientosVeinte	T2	3672	126	0	126
20	PTM	AzulPequeno	B-2	2023-02-18	DoscientosVeinte	T2	3630	72	31	103
26	PTM	AzulPequeno	B-2	2023-02-18	DoscientosVeinte	T2	5246	71	91	162
30	PTM	AzulPequeno	B-2	2023-02-18	DoscientosVeinte	T2	3844	80	22	102
4	PTM	VerdePequeno	B-3	2023-02-18	DoscientosVeinte	T2	1496	27	55	82
5	PTM	VerdePequeno	B-3	2023-02-18	DoscientosVeinte	T2	1408	83	0	83
10	PTM	VerdePequeno	B-3	2023-02-18	DoscientosVeinte	T2	900	77	43	120
13	PTM	VerdePequeno	B-3	2023-02-18	DoscientosVeinte	T2	2530	109	7	116
14	PTM	VerdePequeno	B-3	2023-02-18	DoscientosVeinte	T2	1224	43	0	43
15	PTM	VerdePequeno	B-3	2023-02-18	DoscientosVeinte	T2	1558	35	0	35
18	PTM	VerdePequeno	B-3	2023-02-18	DoscientosVeinte	T2	1634	42	20	62
845	PTM	ChapaMetalica	B-4	2023-02-18	DoscientosVeinte	T2	1125	78	182	260
846	PTM	ChapaMetalica	B-4	2023-02-18	DoscientosVeinte	T2	1763	92	148	240
850	PTM	ChapaMetalica	B-4	2023-02-18	DoscientosVeinte	T2	2254	66	46	112
851	PTM	ChapaMetalica	B-4	2023-02-18	DoscientosVeinte	T2	1368	75	82	157
852	PTM	ChapaMetalica	B-4	2023-02-18	DoscientosVeinte	T2	1728	40	46	86
853	PTM	ChapaMetalica	B-4	2023-02-18	DoscientosVeinte	T2	2535	82	8	90
854	PTM	ChapaMetalica	B-4	2023-02-18	DoscientosVeinte	T2	1066	41	17	58
1	PTM	NaranjaGrande	B-1	2022-07-14	CientoUno	T3	2650	71	5	76
2	PTM	NaranjaGrande	B-1	2022-07-14	CuarentaSeis	T3	1645	50	18	68
3	PTM	NaranjaGrande	B-1	2022-07-14	CuarentaSeis	T3	2280	108	21	129
4	PTM	NaranjaGrande	B-1	2022-07-14	CuarentaSeis	T3	1520	51	24	75
5	PTM	NaranjaGrande	B-1	2022-07-14	CuarentaSeis	T3	3720	109	30	139
6	PTM	NaranjaGrande	B-1	2022-07-14	CuarentaSeis	T3	2400	91	13	104
7	PTM	NaranjaGrande	B-1	2022-07-14	CuarentaSeis	T3	1230	61	29	90
8	PTM	NaranjaGrande	B-1	2022-07-14	CuarentaSeis	T3	1125	69	6	75
9	PTM	NaranjaGrande	B-1	2022-07-14	CuarentaSeis	T3	3968	111	20	131
10	PTM	NaranjaGrande	B-1	2022-07-14	CuarentaSeis	T3	4000	72	9	81
11	PTM	NaranjaGrande	B-1	2022-07-14	CuarentaSeis	T3	2430	58	68	126
12	PTM	NaranjaGrande	B-1	2022-07-14	CuarentaSeis	T3	1350	42	11	53
13	PTM	NaranjaGrande	B-1	2022-07-14	CuarentaSeis	T3	504	15	7	22
14	PTM	NaranjaGrande	B-1	2022-07-14	CuarentaSeis	T3	4800	67	31	98
15	PTM	NaranjaGrande	B-1	2022-07-14	CuarentaSeis	T3	1776	56	62	118
16	PTM	NaranjaGrande	B-1	2022-07-14	CuarentaSeis	T3	2080	70	8	78
17	PTM	NaranjaGrande	B-1	2022-07-14	CuarentaSeis	T3	2860	65	20	85
18	PTM	NaranjaGrande	B-1	2022-07-14	CuarentaSeis	T3	2464	68	47	115
19	PTM	NaranjaGrande	B-1	2022-07-14	CuarentaSeis	T3	2100	61	9	70
21	PTM	NaranjaGrande	B-1	2022-07-14	CuarentaSeis	T3	2408	64	9	73
22	PTM	NaranjaGrande	B-1	2022-07-14	CuarentaSeis	T3	4130	79	35	114
23	PTM	NaranjaGrande	B-1	2022-07-14	CuarentaSeis	T3	2300	63	36	99
24	PTM	NaranjaGrande	B-1	2022-07-14	CuarentaSeis	T3	1880	57	28	85
25	PTM	NaranjaGrande	B-1	2022-07-14	CuarentaSeis	T3	3600	55	32	87
26	PTM	NaranjaGrande	B-1	2022-07-14	CuarentaSeis	T3	1786	74	0	74
27	PTM	NaranjaGrande	B-1	2022-07-14	CuarentaSeis	T3	2650	83	16	99
28	PTM	NaranjaGrande	B-1	2022-07-14	CuarentaSeis	T3	230	21	0	21
29	PTM	NaranjaGrande	B-1	2022-07-14	CuarentaSeis	T3	1900	81	18	99
30	PTM	NaranjaGrande	B-1	2022-07-14	CuarentaSeis	T3	2562	55	36	91
3	PTM	AzulPequeno	B-2	2023-04-22	DoscientosVeinte	T3	4914	66	25	91
5	PTM	AzulPequeno	B-2	2023-04-22	DoscientosVeinte	T3	3819	95	0	95
8	PTM	AzulPequeno	B-2	2023-04-22	DoscientosVeinte	T3	3712	176	0	176
10	PTM	AzulPequeno	B-2	2023-04-22	DoscientosVeinte	T3	5673	167	0	167
15	PTM	AzulPequeno	B-2	2023-04-22	DoscientosVeinte	T3	9200	162	0	162
16	PTM	AzulPequeno	B-2	2023-04-22	DoscientosVeinte	T3	5928	158	0	158
17	PTM	AzulPequeno	B-2	2023-04-22	DoscientosVeinte	T3	6853	168	0	168
19	PTM	AzulPequeno	B-2	2023-04-22	DoscientosVeinte	T3	2501	22	160	182
20	PTM	AzulPequeno	B-2	2023-04-22	DoscientosVeinte	T3	7169	87	88	175
21	PTM	AzulPequeno	B-2	2023-04-22	DoscientosVeinte	T3	8820	129	96	225
22	PTM	AzulPequeno	B-2	2023-04-22	DoscientosVeinte	T3	5880	117	112	229
23	PTM	AzulPequeno	B-2	2023-04-22	DoscientosVeinte	T3	435	11	3
27	PTM	AzulPequeno	B-2	2023-04-22	DoscientosVeinte	T3	6132	95	163	258
28	PTM	AzulPequeno	B-2	2023-04-22	DoscientosVeinte	T3	5040	95	75	170
29	PTM	AzulPequeno	B-2	2023-04-22	DoscientosVeinte	T3	10000	128	22	150
30	PTM	AzulPequeno	B-2	2023-04-22	DoscientosVeinte	T3	6512	160	37	197
4	PTM	VerdePequeno	B-3	2023-04-22	DoscientosVeinte	T3	960	31	82	113
9	PTM	VerdePequeno	B-3	2023-04-22	DoscientosVeinte	T3	1938	58	0	58
10	PTM	VerdePequeno	B-3	2023-04-22	DoscientosVeinte	T3	1600	48	0	48
13	PTM	VerdePequeno	B-3	2023-04-22	DoscientosVeinte	T3	910	49	0	49
14	PTM	VerdePequeno	B-3	2023-04-22	DoscientosVeinte	T3	2688	92	0	92
15	PTM	VerdePequeno	B-3	2023-04-22	DoscientosVeinte	T3	2679	65	84	149
845	PTM	ChapaMetalica	B-4	2023-04-22	DoscientosVeinte	T3	3840	128	168	296
846	PTM	ChapaMetalica	B-4	2023-04-22	DoscientosVeinte	T3	2970	92	232	124
850	PTM	ChapaMetalica	B-4	2023-04-22	DoscientosVeinte	T3	3339	98	112	210
851	PTM	ChapaMetalica	B-4	2023-04-22	DoscientosVeinte	T3	3886	98	110	208
852	PTM	ChapaMetalica	B-4	2023-04-22	DoscientosVeinte	T3	2376	54	68	122
853	PTM	ChapaMetalica	B-4	2023-04-22	DoscientosVeinte	T3	3245	96	13	109
854	PTM	ChapaMetalica	B-4	2023-04-22	DoscientosVeinte	T3	1849	37	36	73
2	PTM	NaranjaGrande	B-1	2023-04-22	DoscientosVeinte	T5	1440	26	10	36
3	PTM	NaranjaGrande	B-1	2023-04-22	DoscientosVeinte	T5	1406	43	0	43
5	PTM	NaranjaGrande	B-1	2023-04-22	DoscientosVeinte	T5	4980	61	18	79
8	PTM	NaranjaGrande	B-1	2023-04-22	DoscientosVeinte	T5	2886	54	0	54
11	PTM	NaranjaGrande	B-1	2023-04-22	DoscientosVeinte	T5	6956	17	89	116
12	PTM	NaranjaGrande	B-1	2023-04-22	DoscientosVeinte	T5	1296	22	4	26
13	PTM	NaranjaGrande	B-1	2023-04-22	DoscientosVeinte	T5	984	23	1	24
14	PTM	NaranjaGrande	B-1	2023-04-22	DoscientosVeinte	T5	2464	38	32	70
15	PTM	NaranjaGrande	B-1	2023-04-22	DoscientosVeinte	T5	6298	72	2	74
16	PTM	NaranjaGrande	B-1	2023-04-22	DoscientosVeinte	T5	4510	86	19	105
17	PTM	NaranjaGrande	B-1	2023-04-22	DoscientosVeinte	T5	2040	59	21	80
18	PTM	NaranjaGrande	B-1	2023-04-22	DoscientosVeinte	T5	5670	95	44	139
19	PTM	NaranjaGrande	B-1	2023-04-22	DoscientosVeinte	T5	2580	68	5	73
23	PTM	NaranjaGrande	B-1	2023-04-22	DoscientosVeinte	T5	132	19	9	10
25	PTM	NaranjaGrande	B-1	2023-04-22	DoscientosVeinte	T5	4108	69	60	129
26	PTM	NaranjaGrande	B-1	2023-04-22	DoscientosVeinte	T5	6084	116	22	138
27	PTM	NaranjaGrande	B-1	2023-04-22	DoscientosVeinte	T5	6468	140	15	155
28	PTM	NaranjaGrande	B-1	2023-04-22	DoscientosVeinte	T5	1080	19	0	19
29	PTM	NaranjaGrande	B-1	2023-04-22	DoscientosVeinte	T5	9592	135	41	176
30	PTM	NaranjaGrande	B-1	2023-04-22	DoscientosVeinte	T5	8316	50	69	109
1	PTM	NaranjaGrande	B-1	2023-02-18	DoscientosVeinte	T4	600	20	7	27
2	PTM	NaranjaGrande	B-1	2023-02-18	DoscientosVeinte	T4	1092	25	8	33
3	PTM	NaranjaGrande	B-1	2023-02-18	DoscientosVeinte	T4	1590	80	62	142
5	PTM	NaranjaGrande	B-1	2023-02-18	DoscientosVeinte	T4	3500	75	14	89
6	PTM	NaranjaGrande	B-1	2023-02-18	DoscientosVeinte	T4	1674	45	50	95
8	PTM	NaranjaGrande	B-1	2023-02-18	DoscientosVeinte	T4	2184	53	0	53
11	PTM	NaranjaGrande	B-1	2023-02-18	DoscientosVeinte	T4	2046	22	85	107
12	PTM	NaranjaGrande	B-1	2023-02-18	DoscientosVeinte	T4	600	20	4	24
13	PTM	NaranjaGrande	B-1	2023-02-18	DoscientosVeinte	T4	442	20	5	25
14	PTM	NaranjaGrande	B-1	2023-02-18	DoscientosVeinte	T4	1178	45	18	63
15	PTM	NaranjaGrande	B-1	2023-02-18	DoscientosVeinte	T4	3968	65	59	124
16	PTM	NaranjaGrande	B-1	2023-02-18	DoscientosVeinte	T4	3010	92	22	114
17	PTM	NaranjaGrande	B-1	2023-02-18	DoscientosVeinte	T4	1961	77	17	94
18	PTM	NaranjaGrande	B-1	2023-02-18	DoscientosVeinte	T4	2691	78	48	126
19	PTM	NaranjaGrande	B-1	2023-02-18	DoscientosVeinte	T4	1462	54	6	60
23	PTM	NaranjaGrande	B-1	2023-02-18	DoscientosVeinte	T4	280	1	8	9
24	PTM	NaranjaGrande	B-1	2023-02-18	DoscientosVeinte	T4	800	0	28	28
25	PTM	NaranjaGrande	B-1	2023-02-18	DoscientosVeinte	T4	5220	83	64	147
27	PTM	NaranjaGrande	B-1	2023-02-18	DoscientosVeinte	T4	6290	52	28	80
28	PTM	NaranjaGrande	B-1	2023-02-18	DoscientosVeinte	T4	231	19	0	19
29	PTM	NaranjaGrande	B-1	2023-02-18	DoscientosVeinte	T4	6624	110	42	152
